# Supplementary material for: Quantitative proteomic analysis of Parkin substrates in Drosophila neurons
Source: Springer Nature journal article supplement (doi:10.1186/s13024-017-0170-3), 2017-04-11

A)

No. of proteins detected in

EXP1

EXP2

EXP3

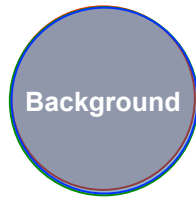

Total 390

380  
388  
385

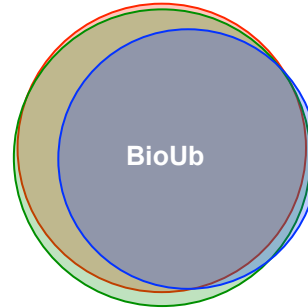

Total 1056

971  
1026  
775

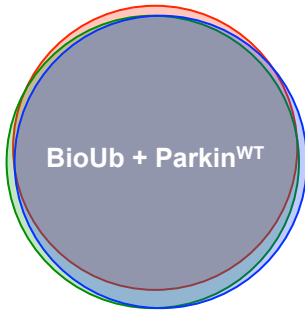

Total 1077

987  
1013  
1011

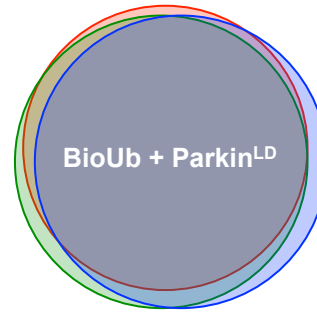

Total 1096

978  
998  
1010

B)

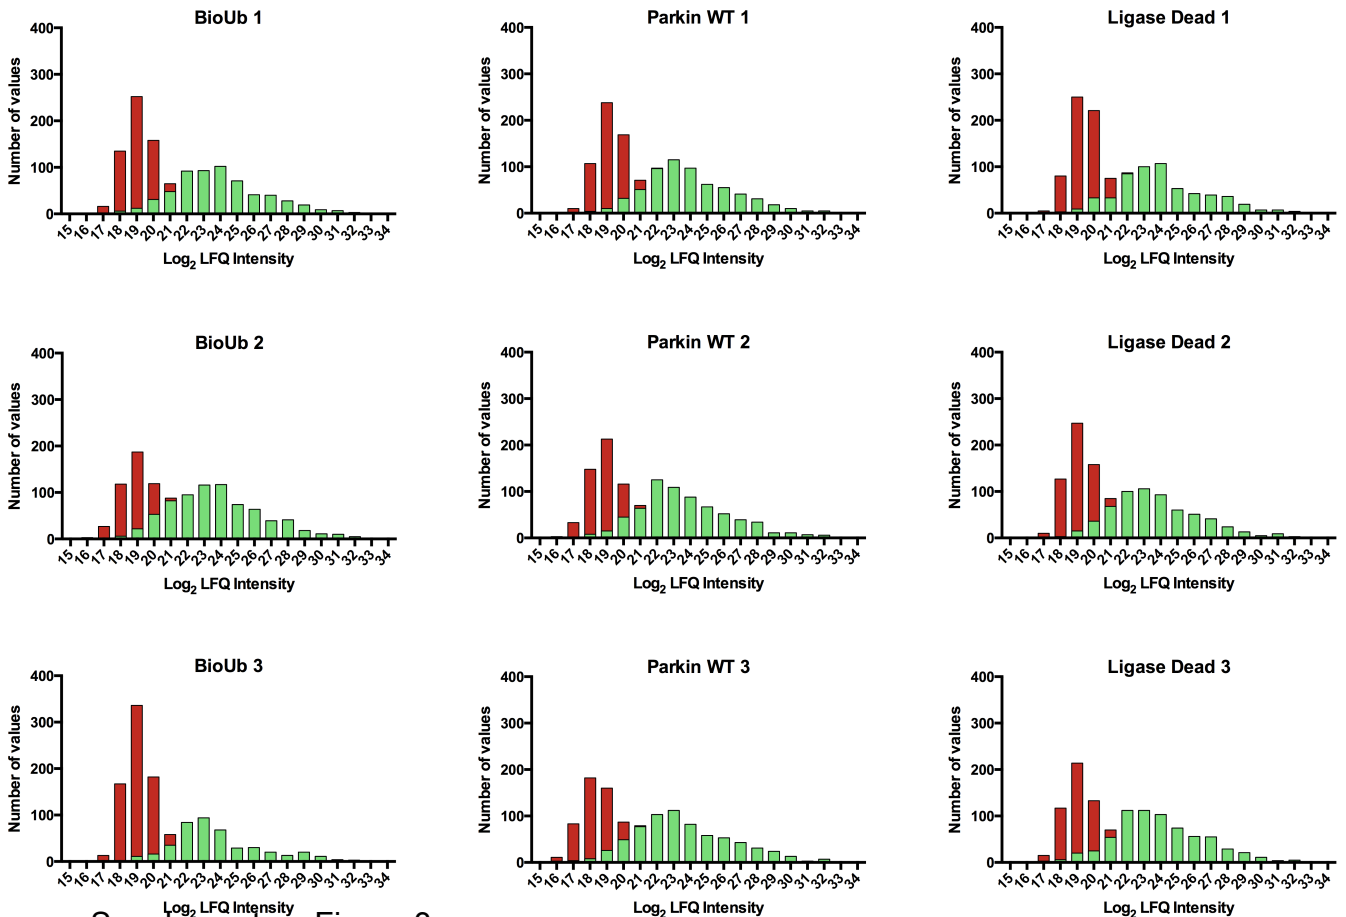

Supplement: 13024_2017_170_MOESM3_ESM.pdf [file 13024_2017_170_MOESM3_ESM.pdf]
