# Supplementary material for: Quantitative proteomic analysis of Parkin substrates in Drosophila neurons
Source: PubMed Central journal article supplement (PMC5387213; doi:10.1186/s13024-017-0170-3), 2017-04-11
Supplement: 13024_2017_170_MOESM6_ESM.pdf [file 13024_2017_170_MOESM6_ESM.pdf]

A)

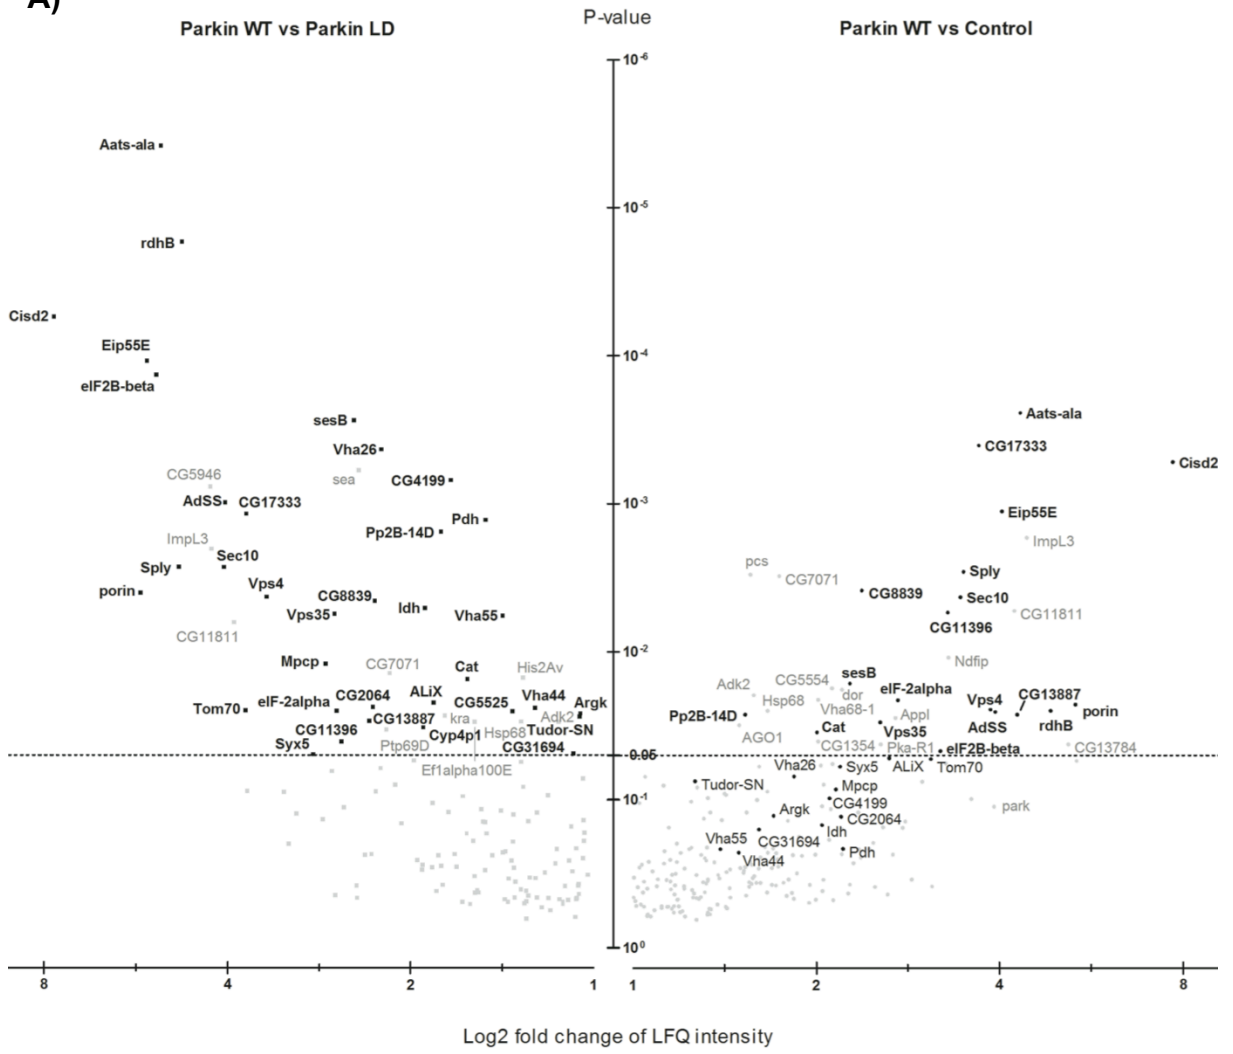

B)

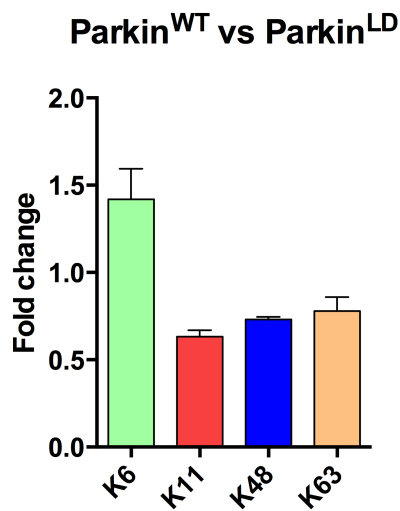

Supplementary Figure 6
