# Supplementary material for: Quantitative proteomic analysis of Parkin substrates in Drosophila neurons
Source: PubMed Central journal article supplement (PMC5387213; doi:10.1186/s13024-017-0170-3), 2017-04-11
Supplement: 13024_2017_170_MOESM7_ESM.pdf [file 13024_2017_170_MOESM7_ESM.pdf]

**A****Elution**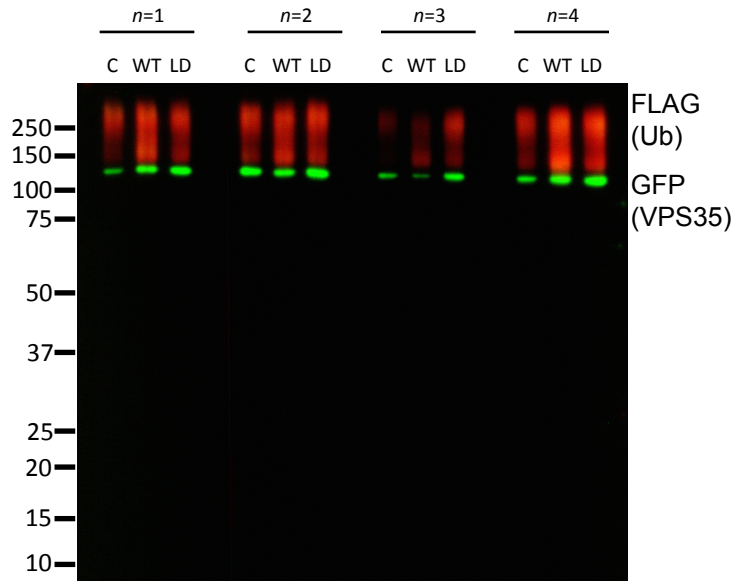**Input**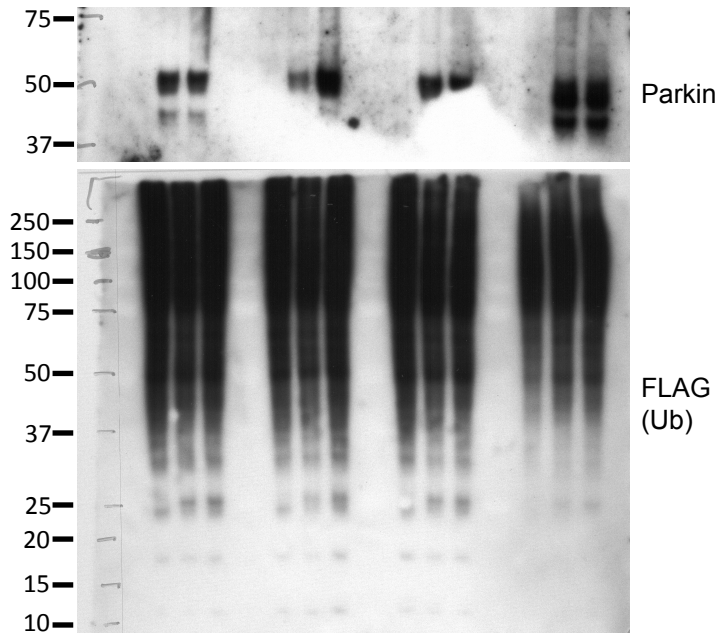**B**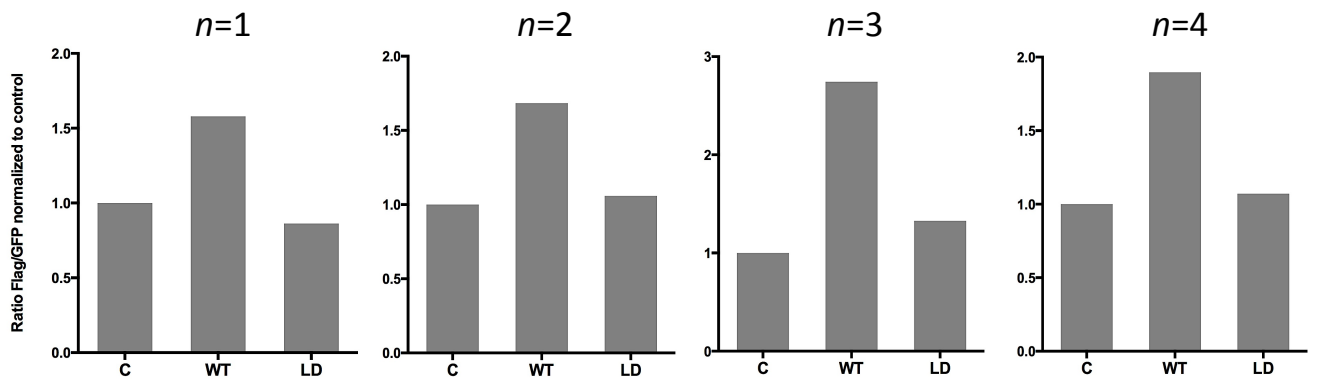

Supplementary Figure 7
