# Supplementary material for: Quantitative proteomic analysis of Parkin substrates in Drosophila neurons
Source: Springer Nature journal article supplement (doi:10.1186/s13024-017-0170-3), 2017-04-11
Supplement: MOESM4 [file 12213058]

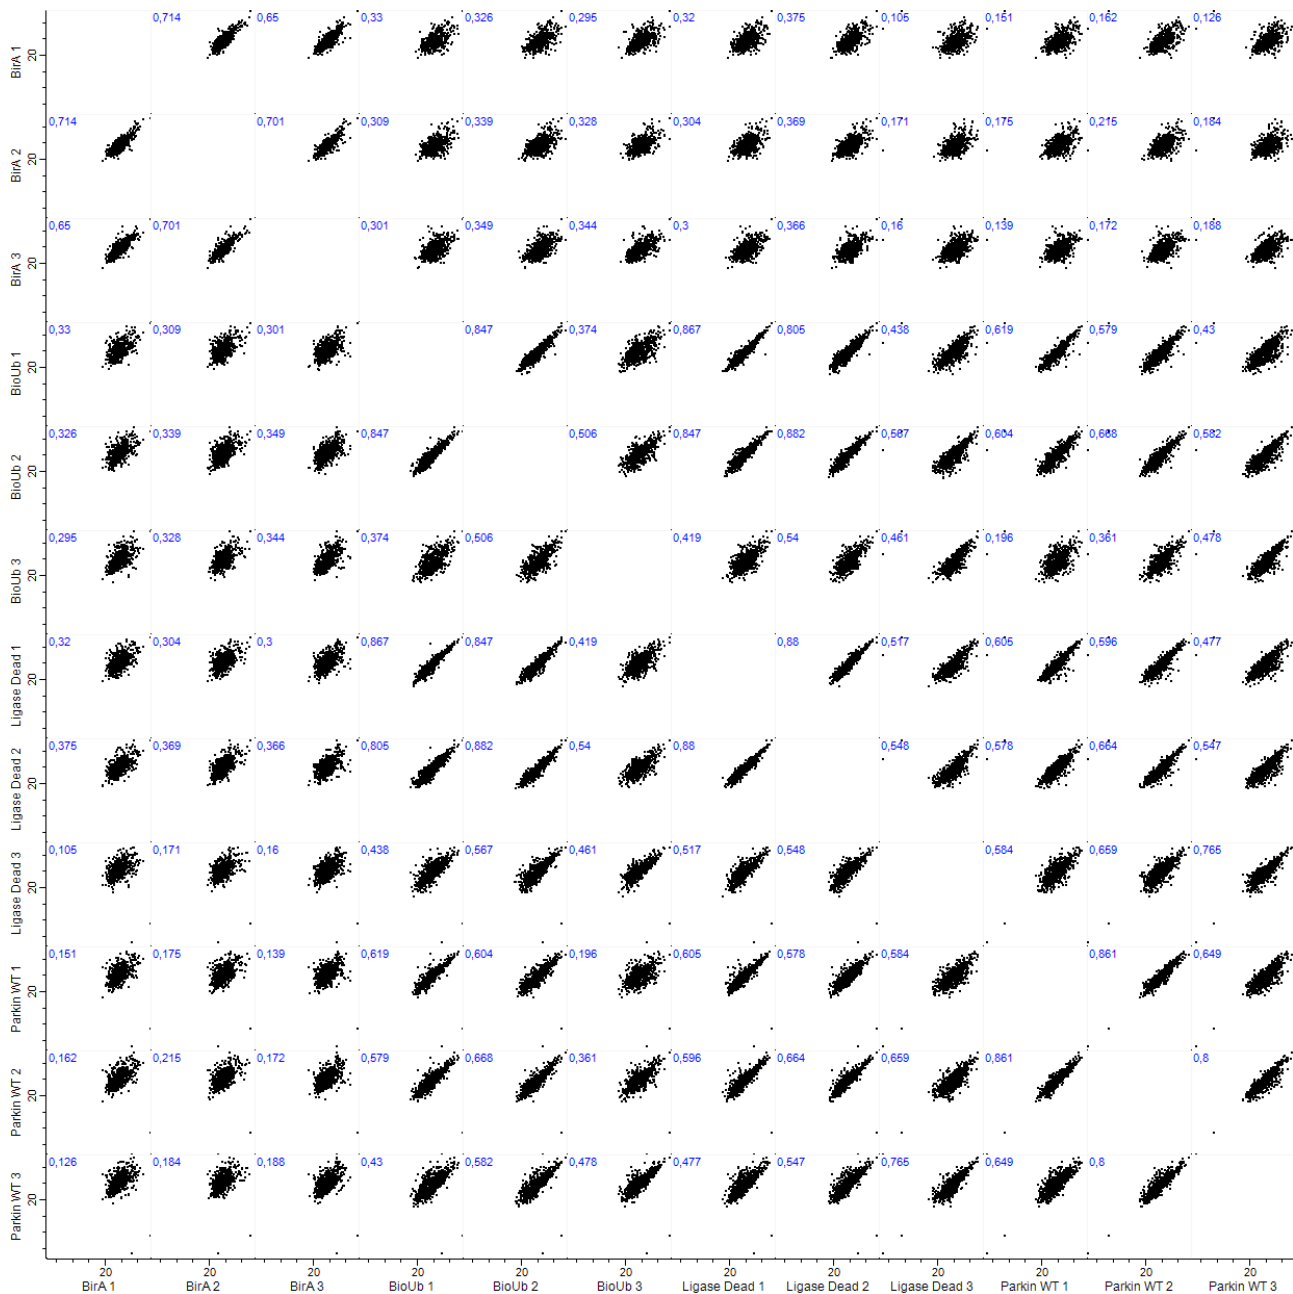

Supplementary Figure 4
