# Supplementary material for: Quantitative proteomic analysis of Parkin substrates in Drosophila neurons
Source: Springer Nature journal article supplement (doi:10.1186/s13024-017-0170-3), 2017-04-11
Supplement: MOESM5 [file 12213058]

A)

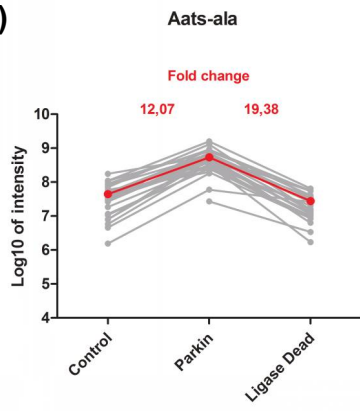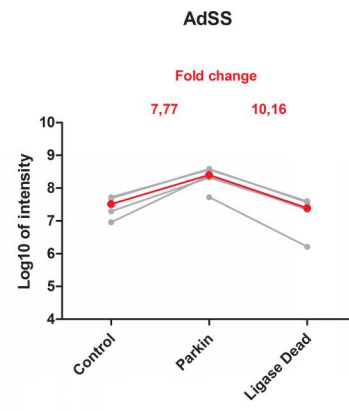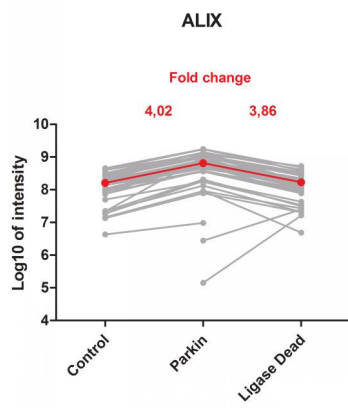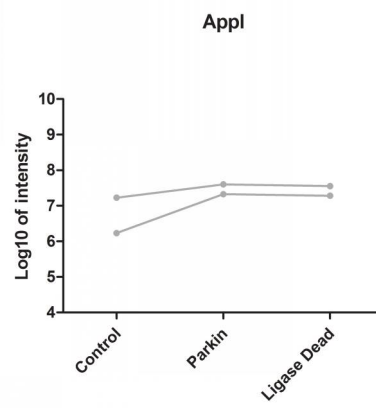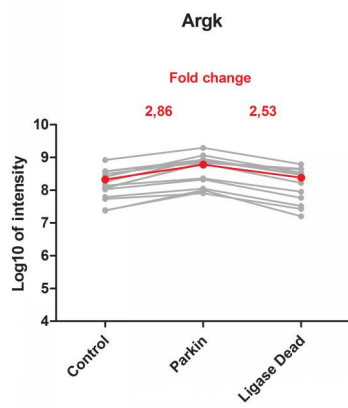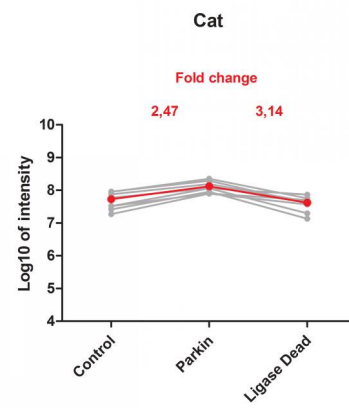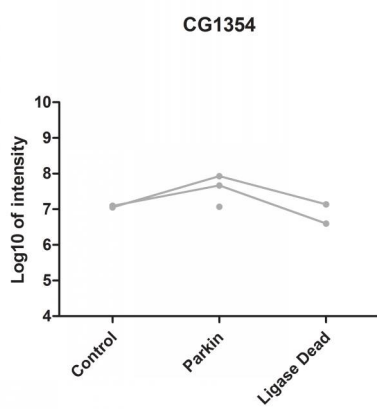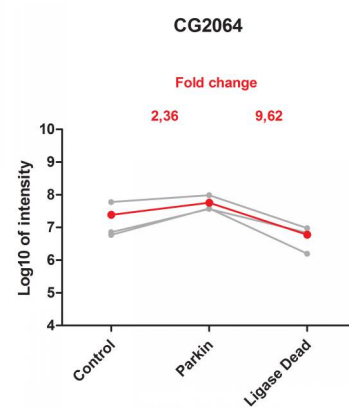

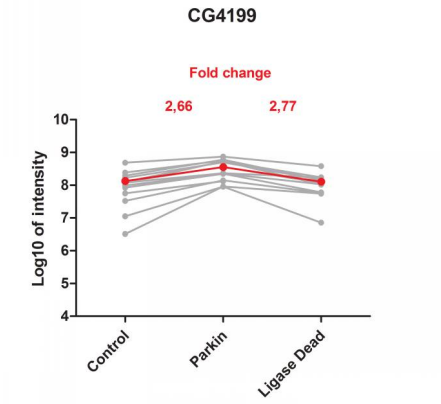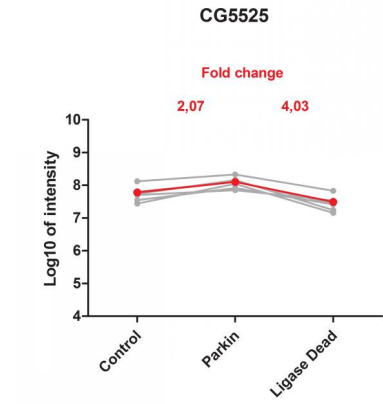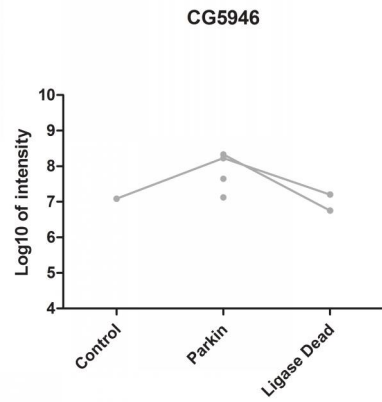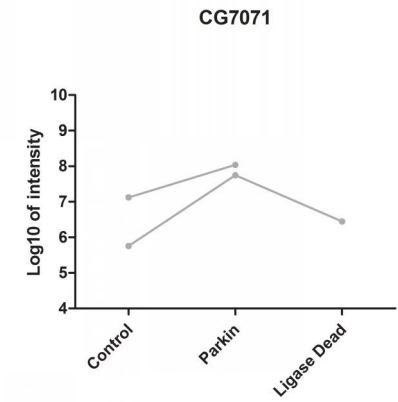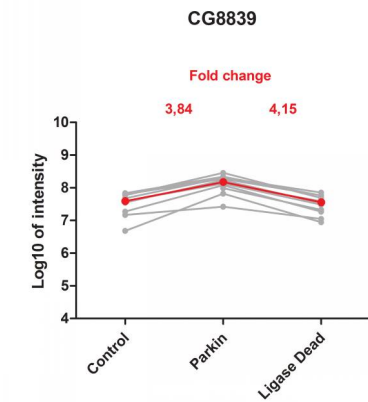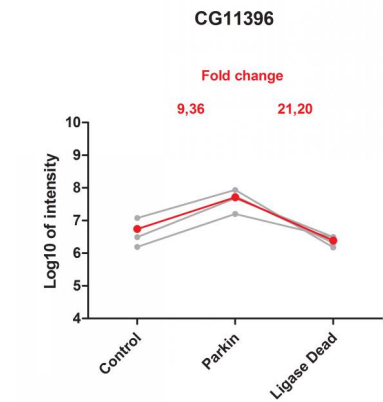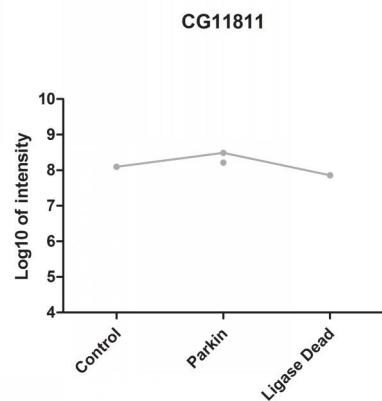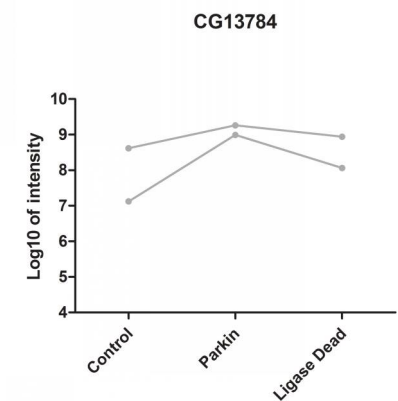

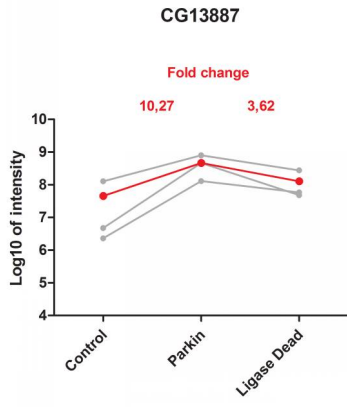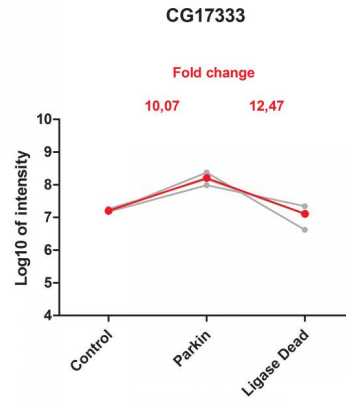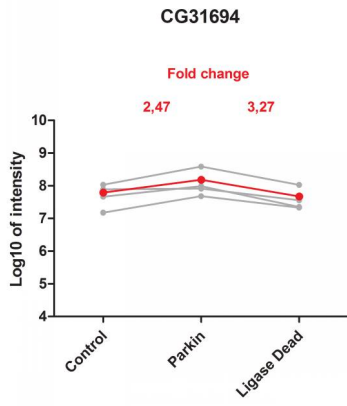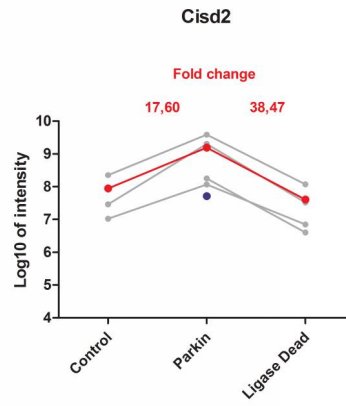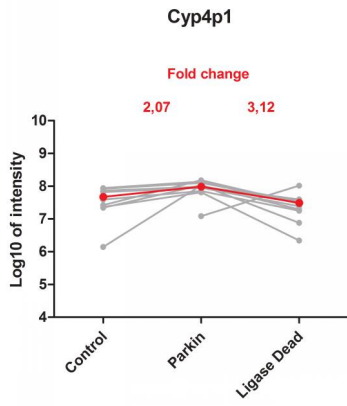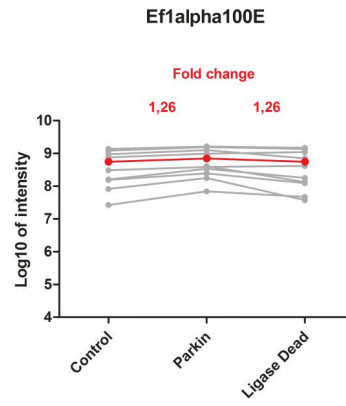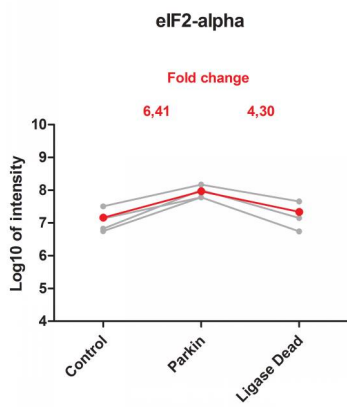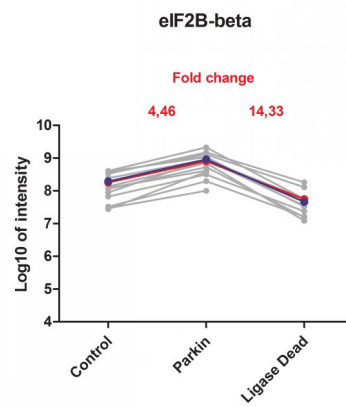

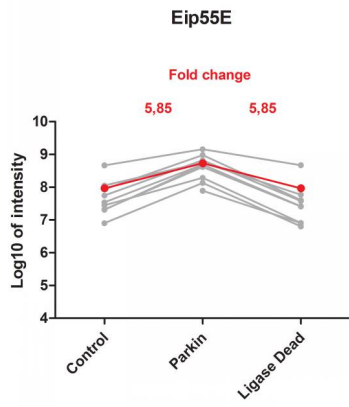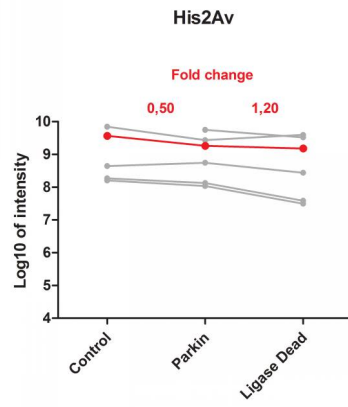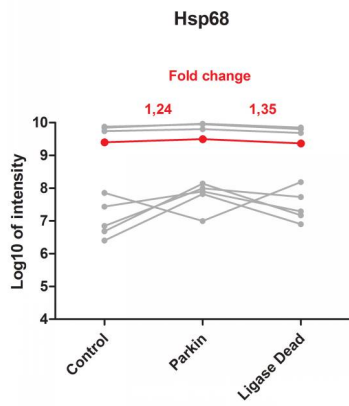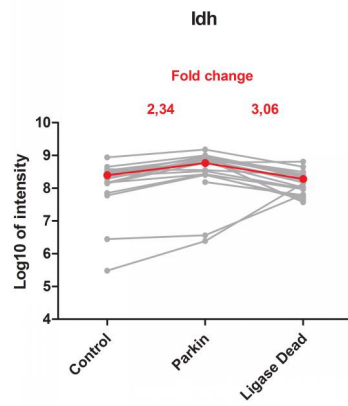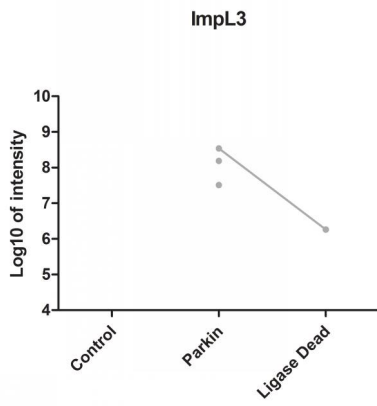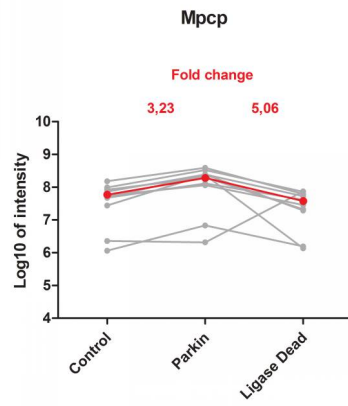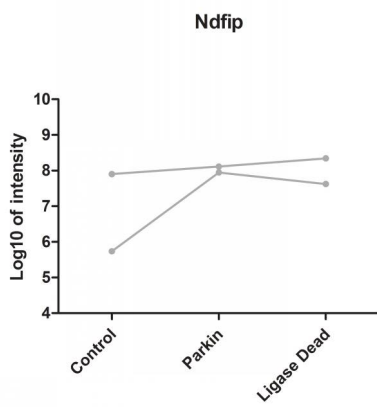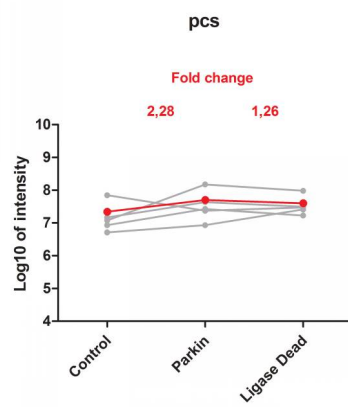

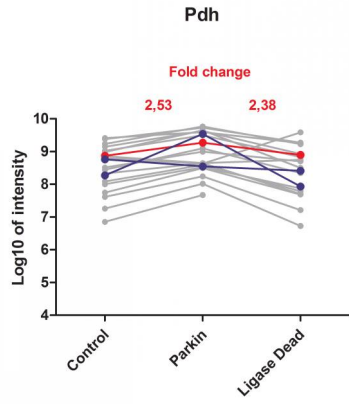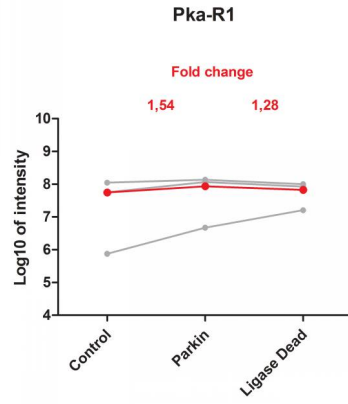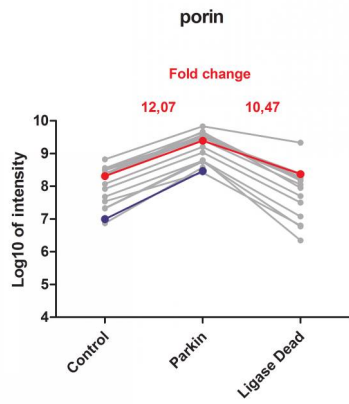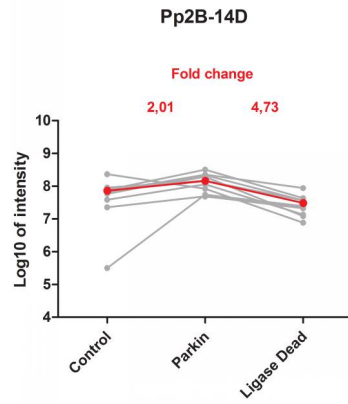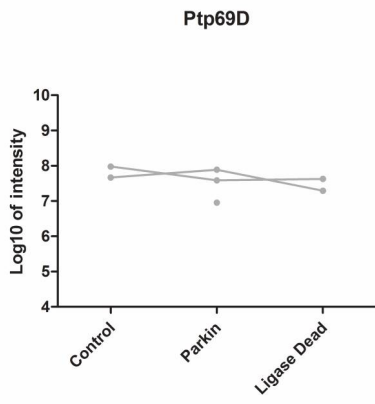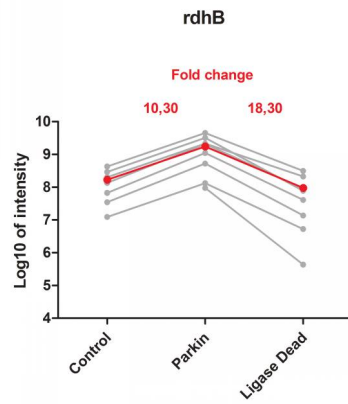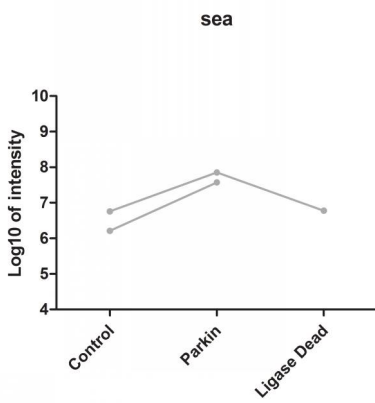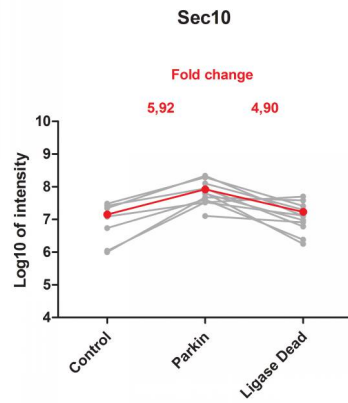

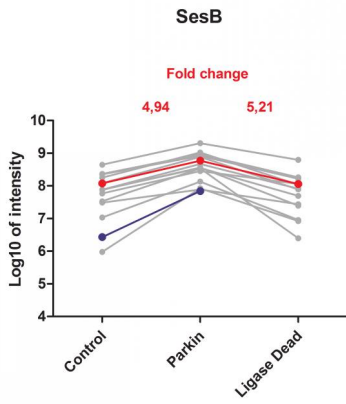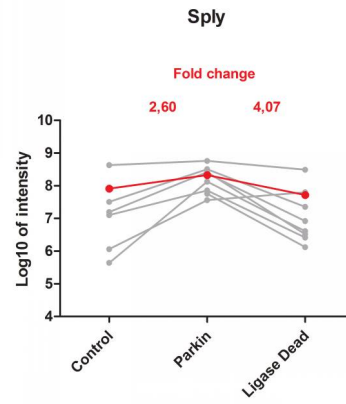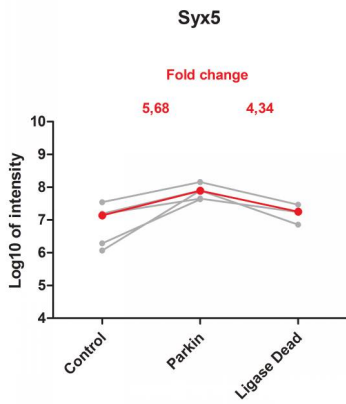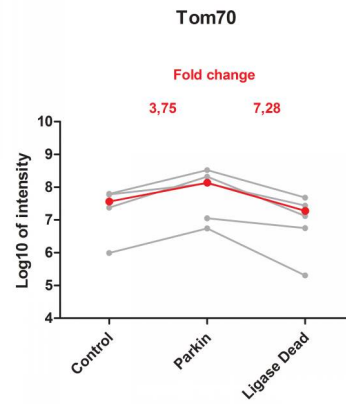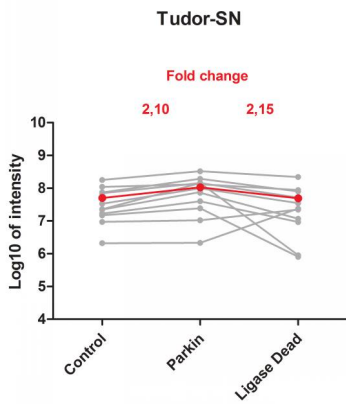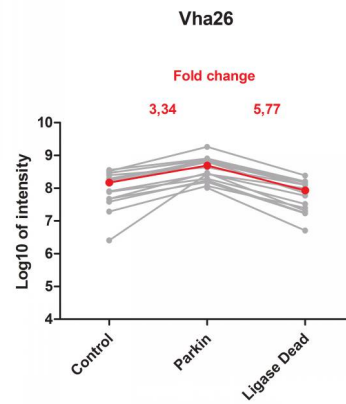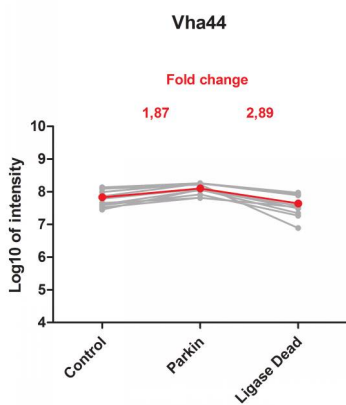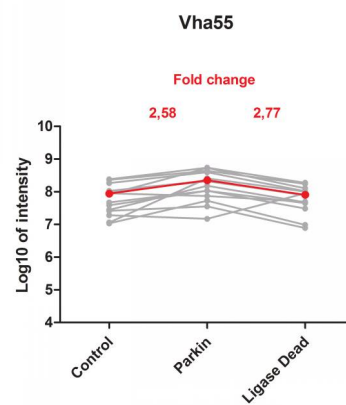

### Vha68-1

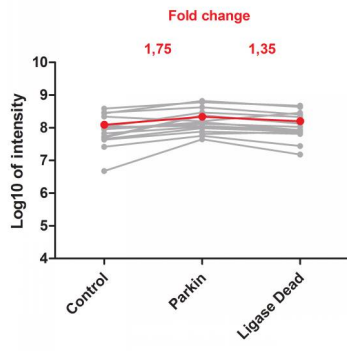

### Vps4

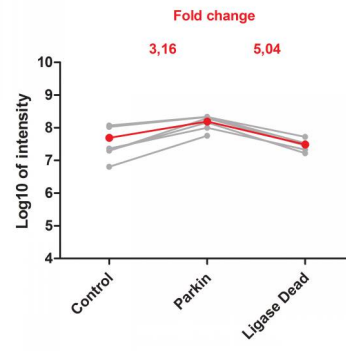

### Vps35

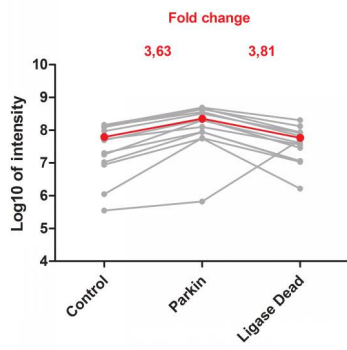

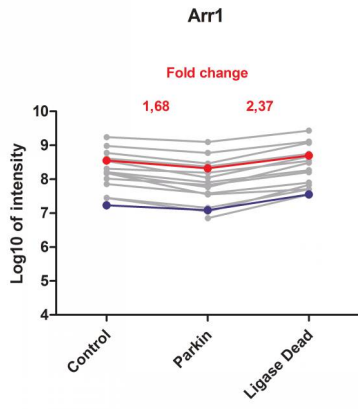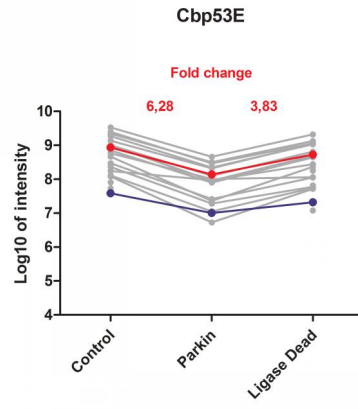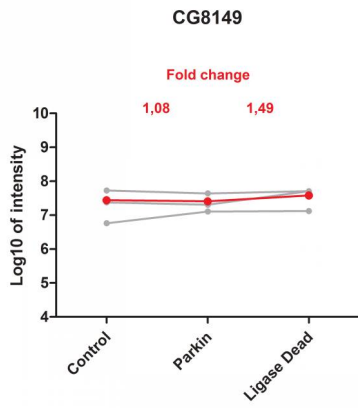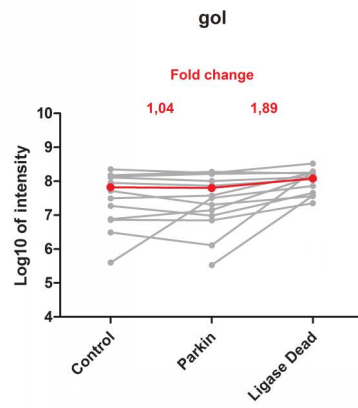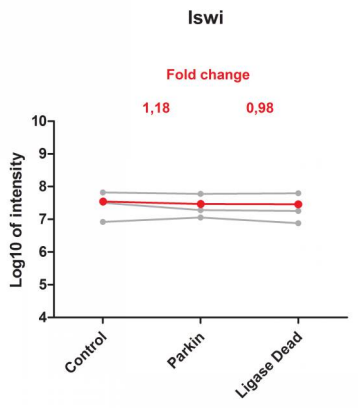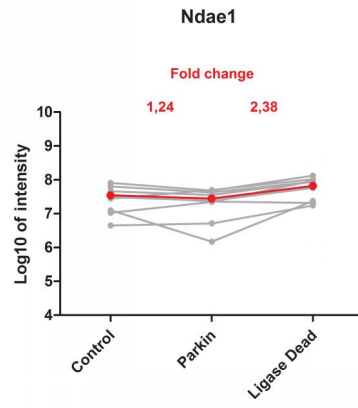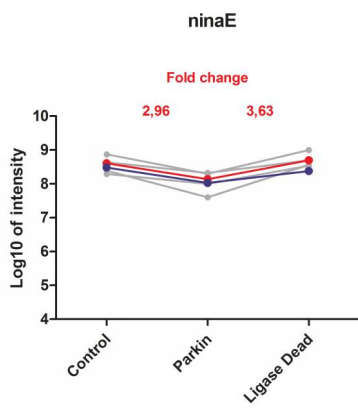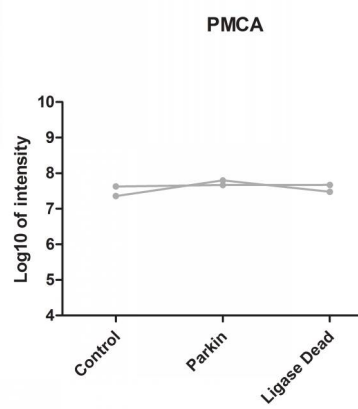



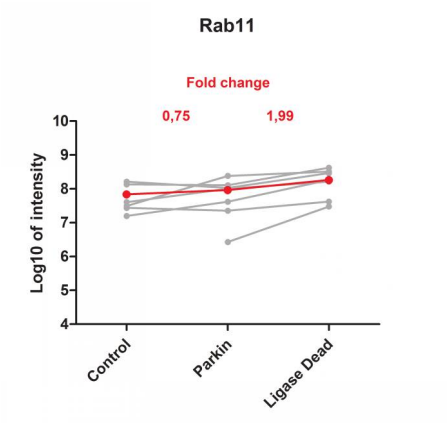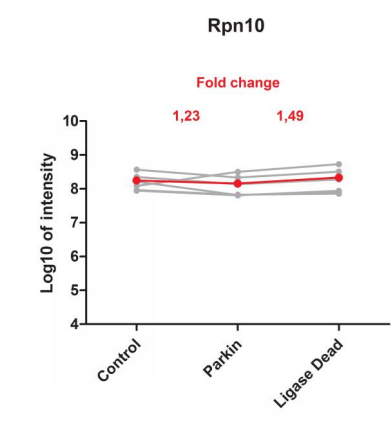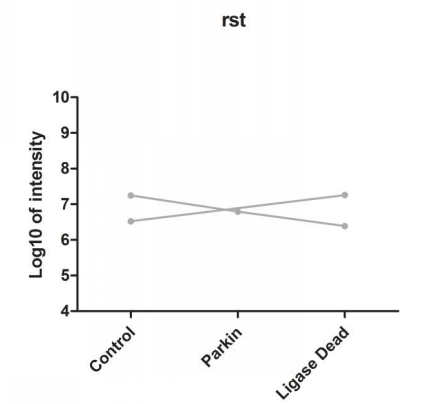

**B)**

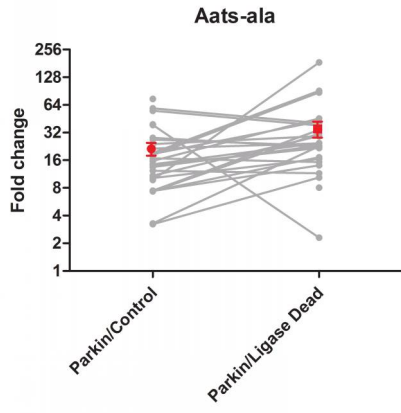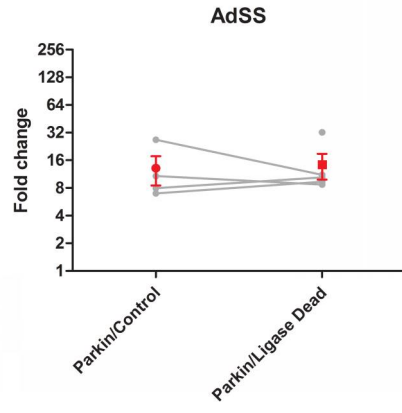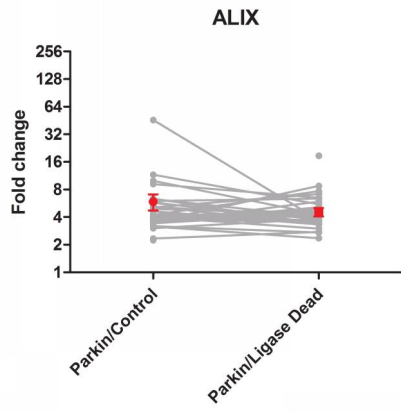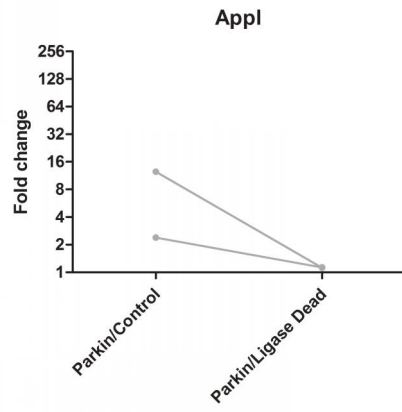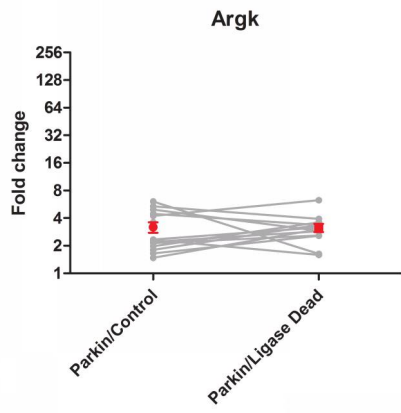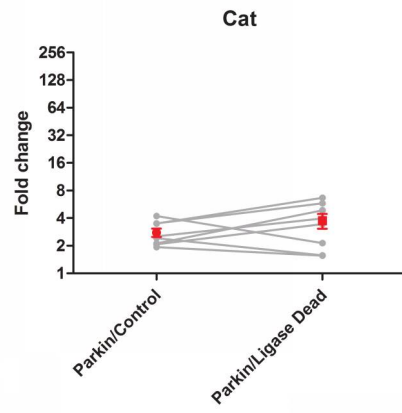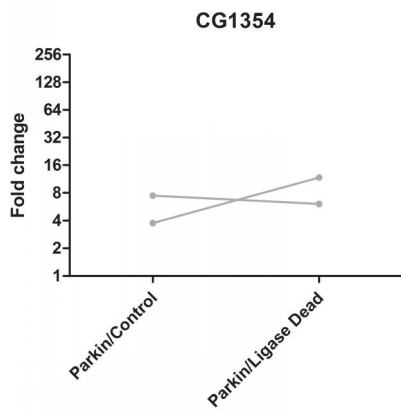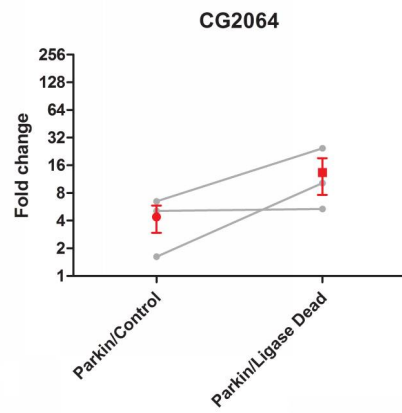

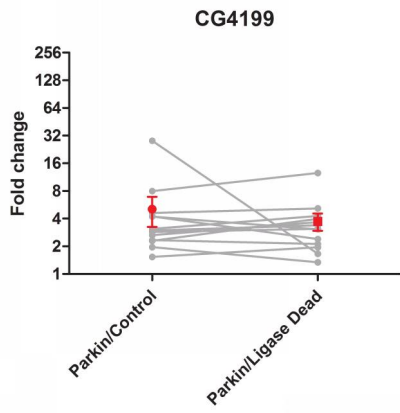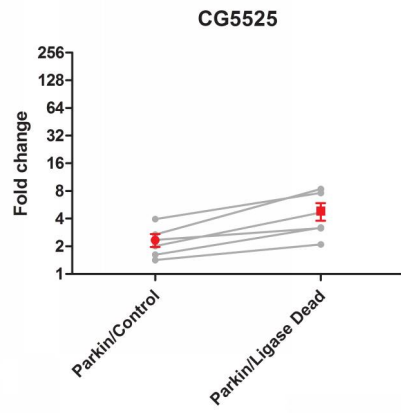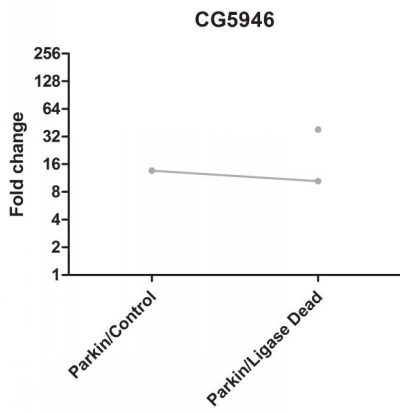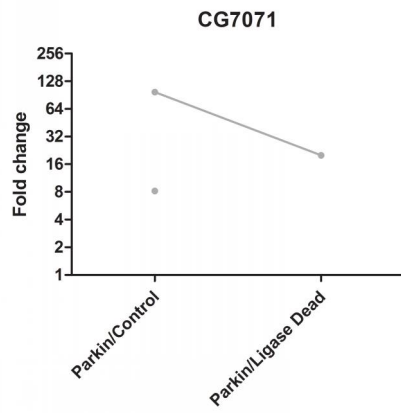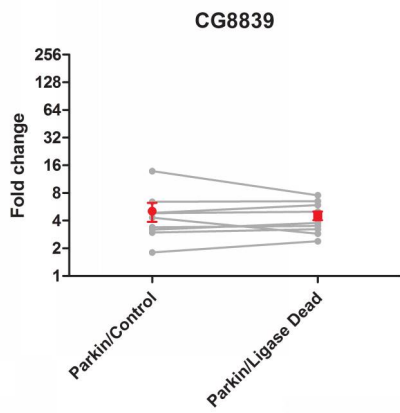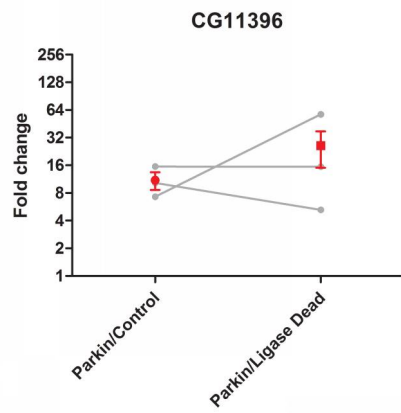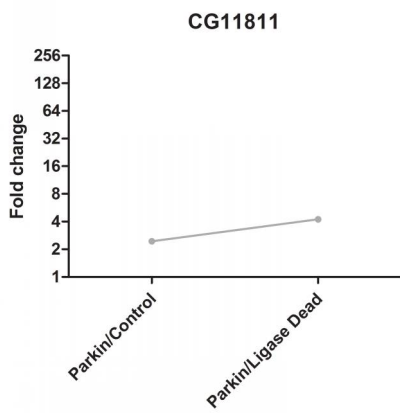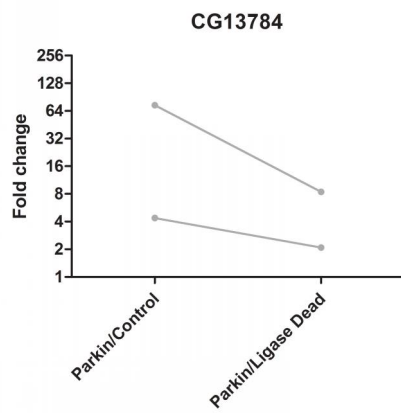

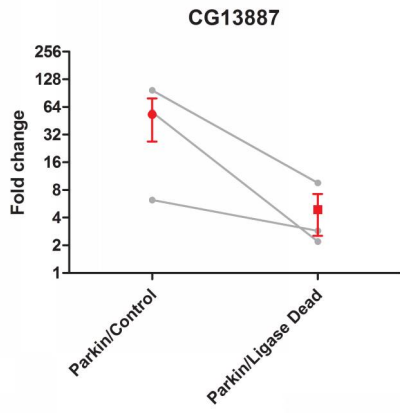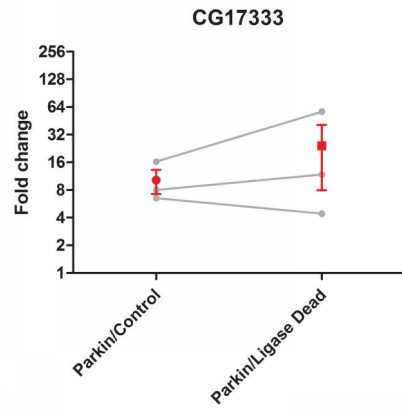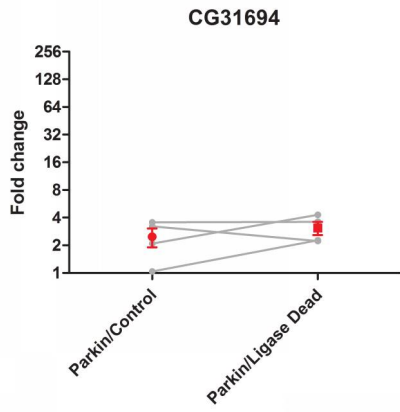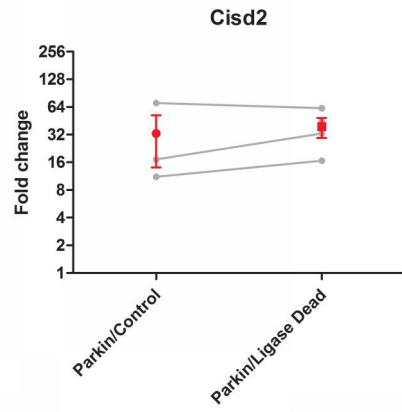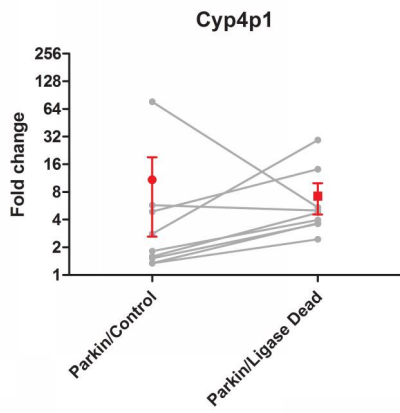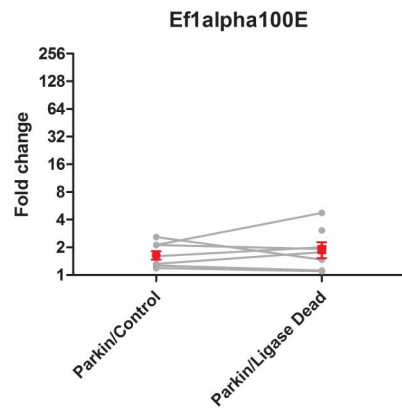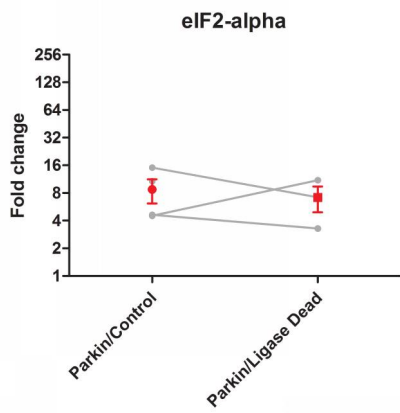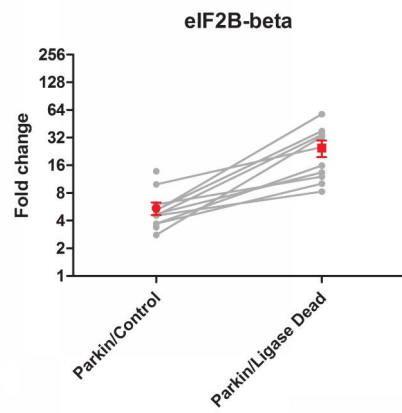

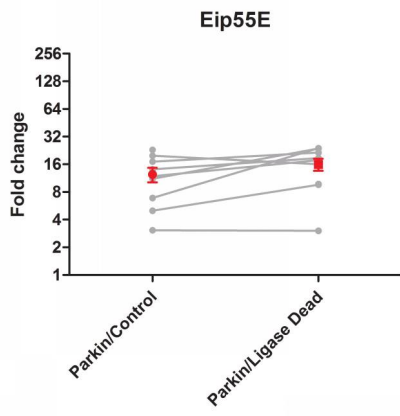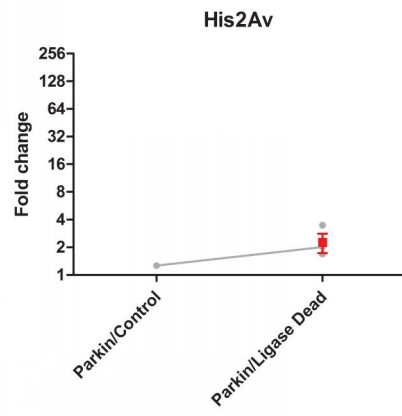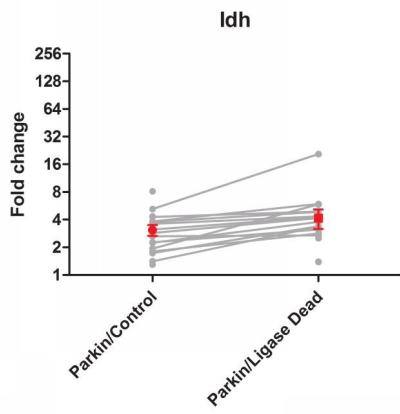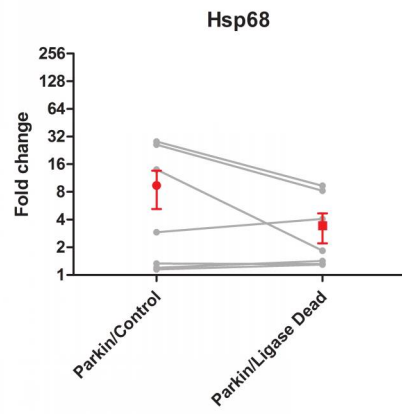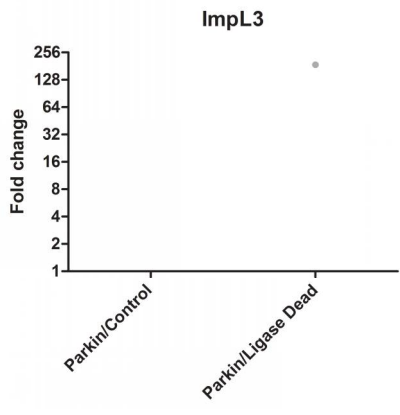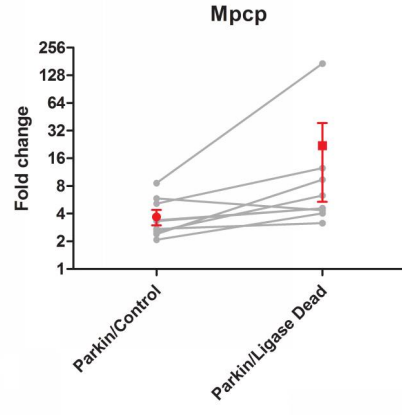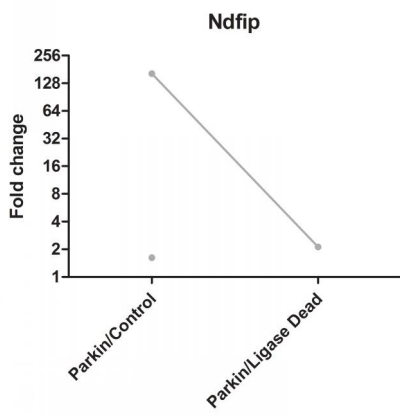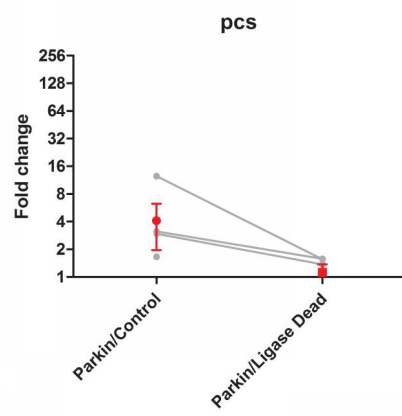

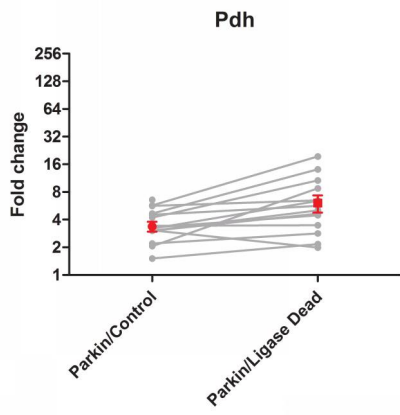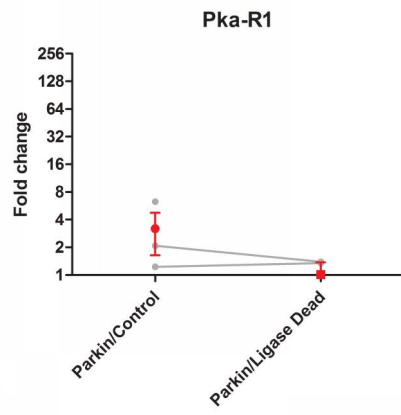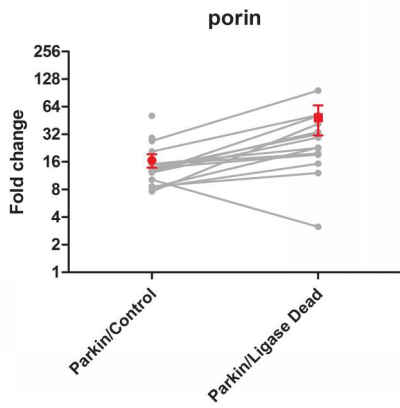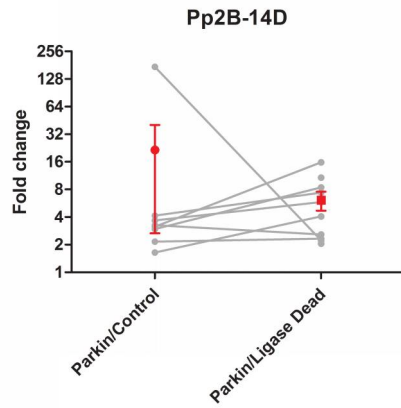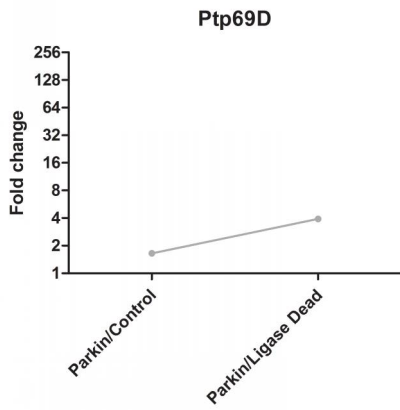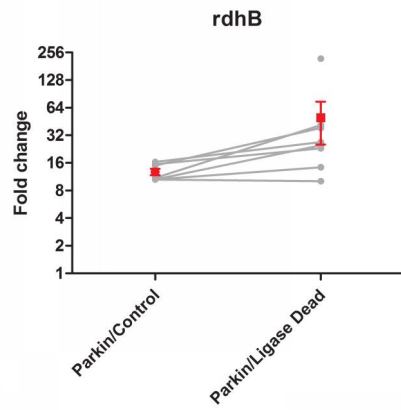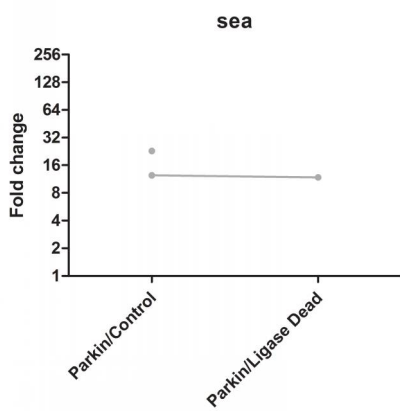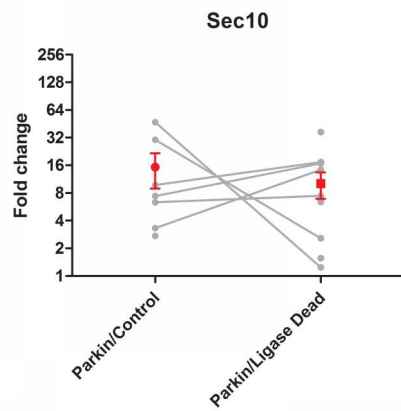

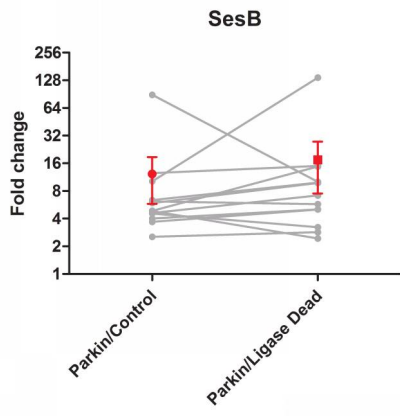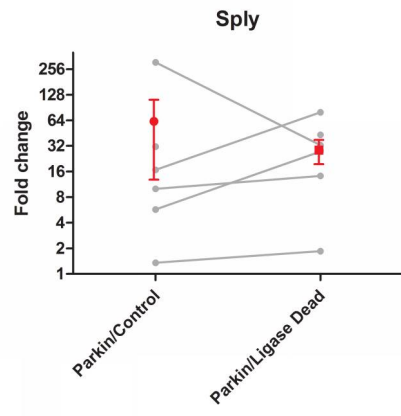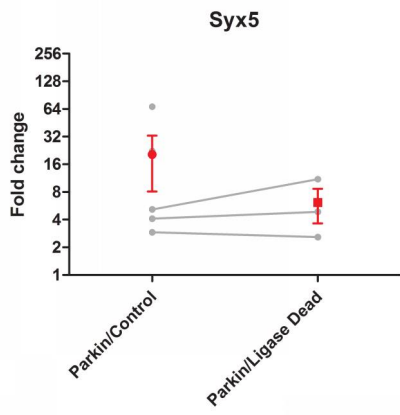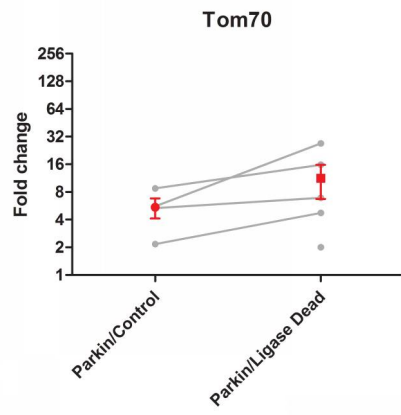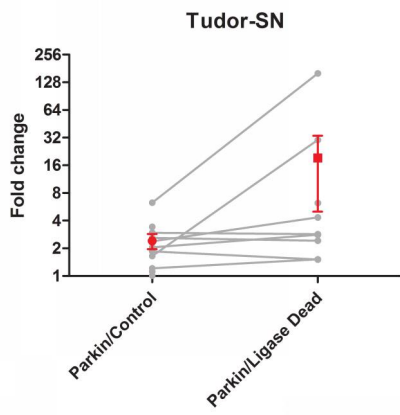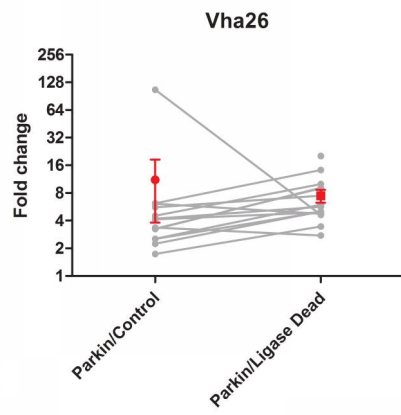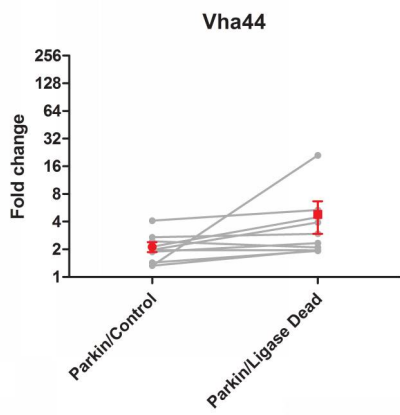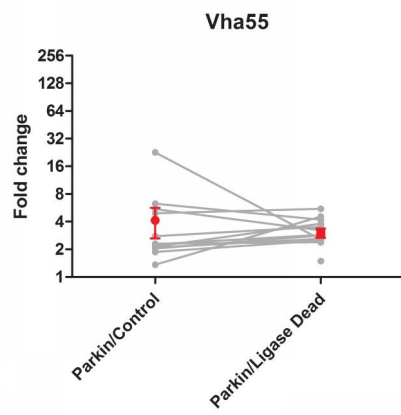

Vha68-1

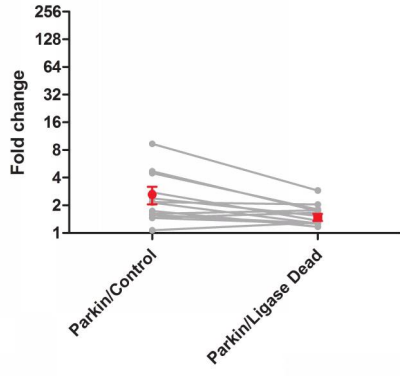

Vps4

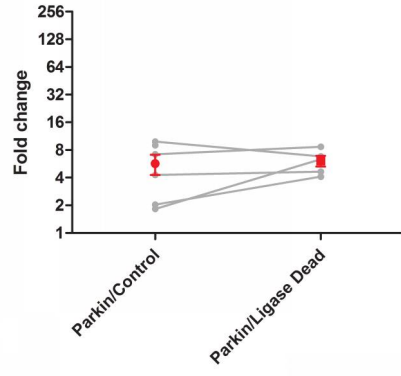

Vps35

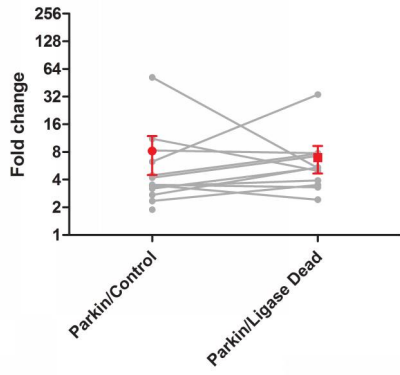



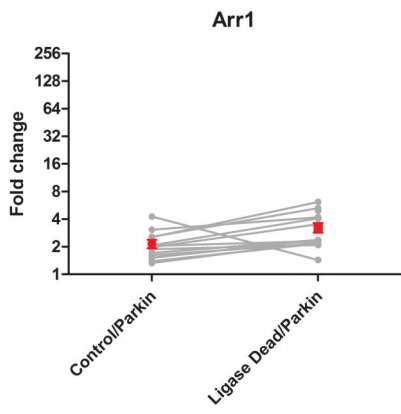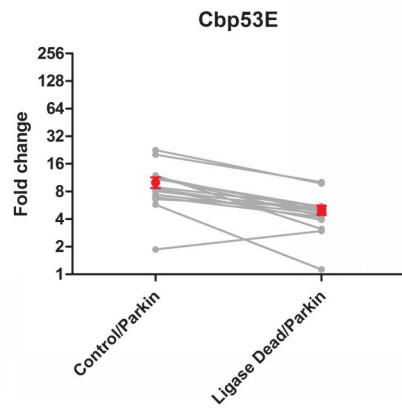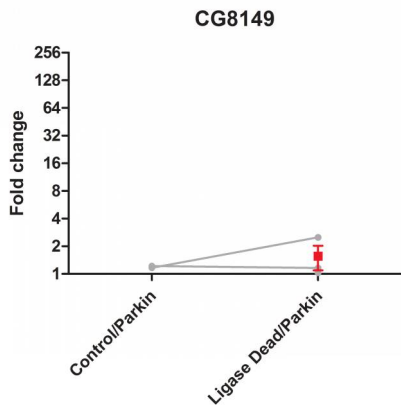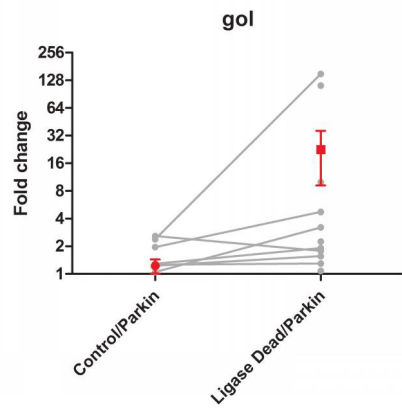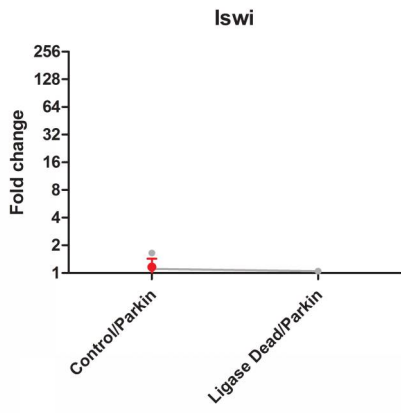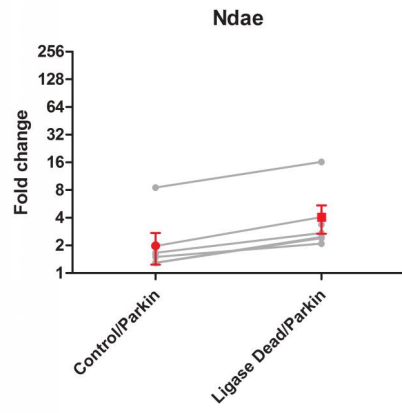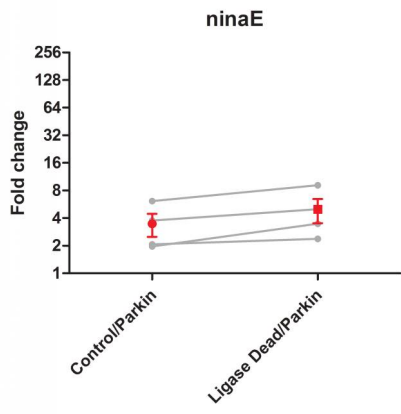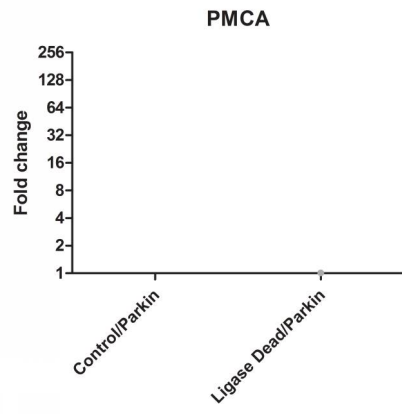

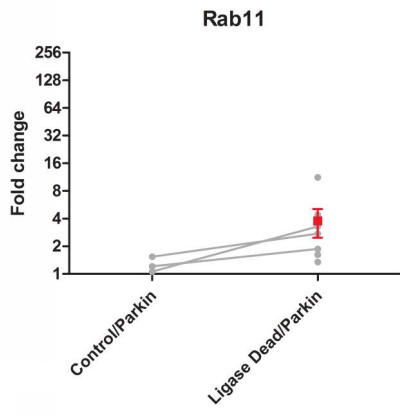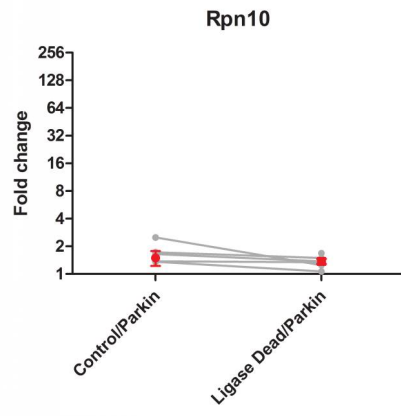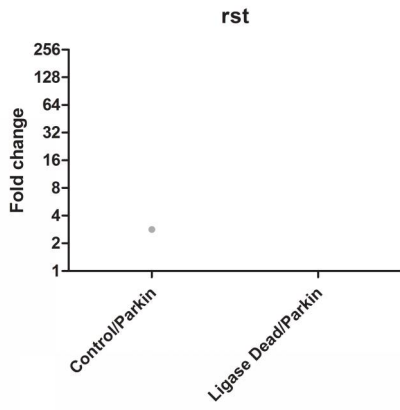

Supplementary Figure 5
